# Supplementary material for: The synergistic effect of Ni and WO 2 effectively boosts the electrochemical reduction of nitrite to ammonia
Source: Royal Society of Chemistry journal article supplement (doi:10.1039/d4ta07261h), 2024-12-10
Supplement: d4ta07261h1.pdf [file d4ta07261h1.pdf]

## Electronic Supplementary Information

### Experimental section

**Materials:** Sodium Tungstate Dihydrate ( $\text{Na}_2\text{WO}_4 \cdot 2\text{H}_2\text{O}$ ), Nickel foam (NF), Ammonium sulfate ( $(\text{NH}_4)_2\text{SO}_4$ ), Nickel sulfate ( $\text{NiSO}_4$ ), Sodium sulfate ( $\text{Na}_2\text{SO}_4$ ), anhydrous ethanol ( $\text{C}_2\text{H}_6\text{O}$ ), ammonium chloride ( $\text{NH}_4\text{Cl}$ ), sodium hydroxide ( $\text{NaOH}$ ), salicylic acid ( $\text{C}_7\text{H}_6\text{O}_3$ ), sodium citrate dihydrate ( $\text{C}_6\text{H}_5\text{Na}_3\text{O}_7 \cdot 2\text{H}_2\text{O}$ ), p-dimethylamino benzaldehyde ( $\text{C}_9\text{H}_{11}\text{NO}$ ), and sodium nitroferricyanide dihydrate ( $\text{C}_5\text{FeN}_6\text{Na}_2\text{O} \cdot 2\text{H}_2\text{O}$ ) were purchased from Chengdu Kelong Ltd.

**Preparation of  $\text{WO}_3/\text{NF}$ :** Typically, 0.184 g of  $\text{Na}_2\text{WO}_4 \cdot 2\text{H}_2\text{O}$  and 0.3 g of  $(\text{NH}_4)_2\text{SO}_4$  were dissolved in 15 mL of deionized water, respectively, and then mixed with slow stirring for one hour. Finally, the product was transferred to a 50 ml sealed Teflon-lined stainless steel autoclave. Subsequently, The Nickel foam (NF) was ultrasonically cleaned with acetone, ethanol, and deionized water for 10 min and dried in air. And, the cleaned NF was placed in the solution in the autoclave. Then the autoclave was kept at 160 °C for 16 h. After the autoclave cooled down at room temperature, the NF was taken out and washed with water and ethanol several times and subsequently dried at 60 °C overnight.

**Preparation of  $\text{WO}_2/\text{NF}$ :** The precursor  $\text{WO}_3/\text{NF}$  was put into a tubular furnace, and argon hydrogen atmosphere was injected into the furnace for 30 minutes, the heating rate was 5 °C/min, and the heat preservation was held at 650 °C for 0.5 h.

**Preparation of  $\text{Ni}@\text{WO}_2/\text{NF}$ :**  $\text{WO}_2/\text{NF}$  electrodes were electroplated with 0.13 M  $\text{NiSO}_4$ , 0.13 M  $\text{Na}_2\text{SO}_4$ , and 0.1 M  $\text{C}_6\text{H}_5\text{Na}_3\text{O}_7 \cdot 2\text{H}_2\text{O}$  at a current density of 10 mA  $\text{cm}^{-2}$  and plating time of 180 s.

**Characterizations:** The crystal structure of the prepared material was determined

using an X-ray diffractometer with Cu K $\alpha$  radiation (DX-2700B). microstructural observations were performed on a field-emission scanning electron microscopy (FEI Insect F50) and an atomic resolution scanning transmission electron microscopy (FEI Talos F200S Super). XPS measurements were carried out with Thermo Fischer ESCALAB Xi<sup>+</sup>. The absorbance data were measured via an Ultraviolet-visible (UV-Vis) spectrophotometer (Shimadzu UV-2600). EPR spectrum was recorded on a Bruker EMX spectrometer at room temperature.

**Electrochemical measurements:** All electrochemical measurements were carried out in an H-shaped cell separated by a Nafion 117 membrane using a CHI 760E electrochemical workstation (Chenhua, Shanghai). The area of the working electrode immersed in the electrolyte is 0.25 cm<sup>2</sup>. LSV was performed in Ar-saturated 0.1 M NaOH with 0.1 M NaNO<sub>2</sub> at a scan rate of 5 mV s<sup>-1</sup>. All potentials reported in this work were converted to a reversible hydrogen electrode (RHE) scale, and current densities were normalized to the geometric surface area. All experiments were carried out at room temperature (25 °C).

**Determination of NH<sub>3</sub>:** The NH<sub>3</sub> concentration in the electrolyte was determined (the obtained electrolyte was diluted 50 times) by the indophenol blue method. Specifically, 2 mL of electrolyte collected after electrolysis was mixed with 2 mL of coloring solution (1 M NaOH containing 5% salicylic acid and 5% sodium citrate), and 1 mL of oxidizing solution (0.05 M NaClO). Then 0.2 mL oxidation solution (0.05 M NaClO) mL catalyst solution (1 wt% C<sub>5</sub>FeN<sub>6</sub>Na<sub>2</sub>O 2H<sub>2</sub>O) was dropped into the collected solution. After standing in the dark for 2 h, the concentration of NH<sub>3</sub> was determined by UV-Vis at a specific wavelength of 655 nm. The concentration-absorbance curve was calibrated using the standard NH<sub>4</sub>Cl solution

with known concentrations of 0.0, 0.25, 0.5, 1.0, 1.5, 2.0, and 2.5  $\mu\text{g mL}^{-1}$  in 0.1 M NaOH. The fitting curve ( $y = 0.41927x + 0.02789$ ,  $R^2 = 0.9998$ ) shows a good linear relation of absorbance value with  $\text{NH}_3$  concentration.

#### **Determination of $\text{NH}_3$ yield and FE:**

The  $\text{NH}_3$  FE is estimated from the charge consumed for  $\text{NO}_2^-$  reduction and the total charge passed through the electrode:

$$\text{FE} = 6 \times F \times V \times [\text{NH}_3] / (Q \times 17) \times 100\%$$

The yield rate of  $\text{NH}_3$  (aq) is calculated:

$$\text{NH}_3 \text{ yield} = V \times [\text{NH}_3] / (A \times t \times 17)$$

Where  $[\text{NH}_3]$  is the concentration of  $\text{NH}_3$  (aq),  $F$  is the Faradaic constant ( $96485 \text{ C mol}^{-1}$ ),  $V$  is the volume of electrolyte in the anode compartment (45 mL),  $Q$  is the total charge passing the electrode,  $t$  is the electrolysis time, and  $A$  is the geometric surface area.

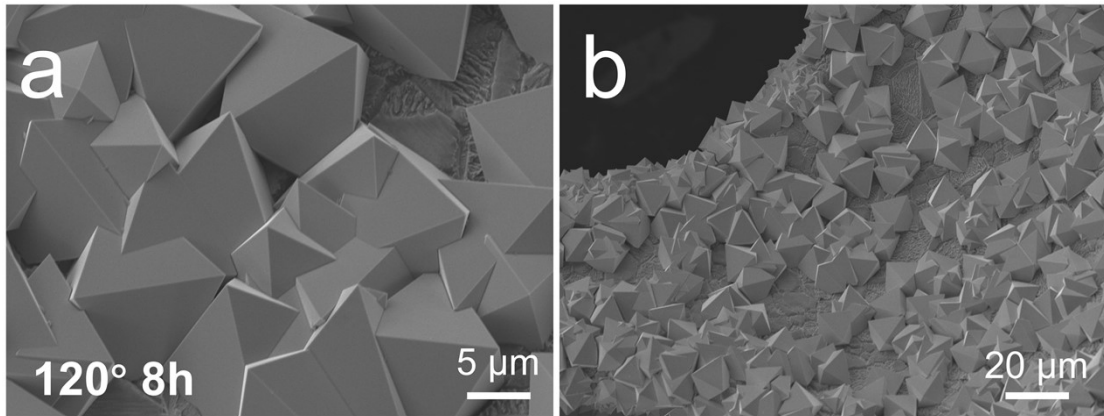

**Fig. S1.** 120 °C for 8 h SEM images of WO<sub>3</sub>/NF.

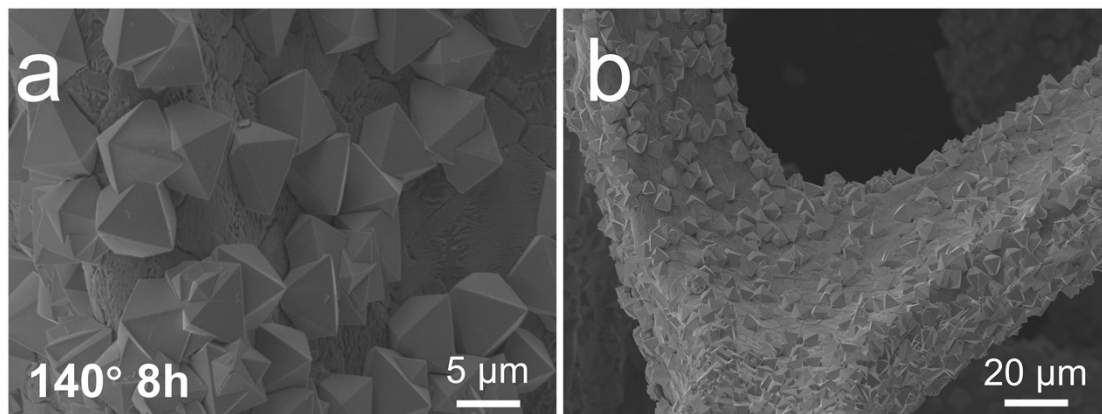

**Fig. S2.** 140 °C for 8 h SEM images of WO<sub>3</sub>/NF.

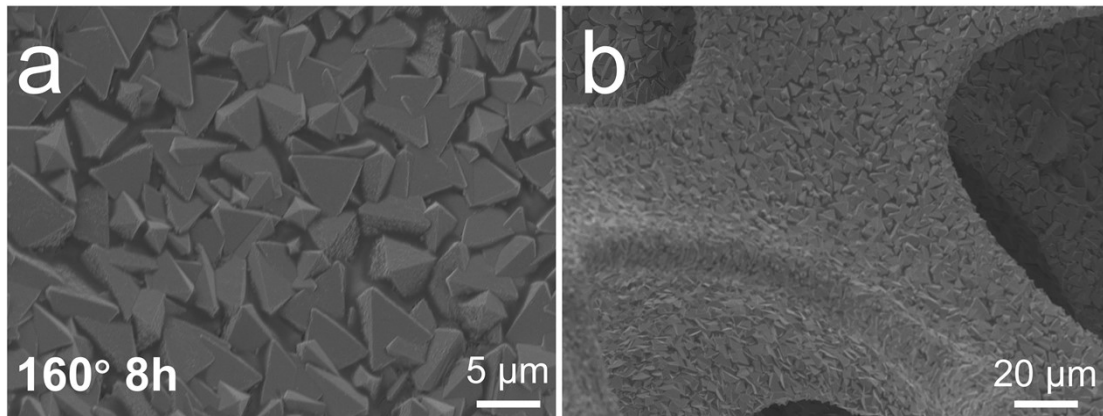

**Fig. S3.** 160 °C for 8 h SEM images of WO<sub>3</sub>/NF.

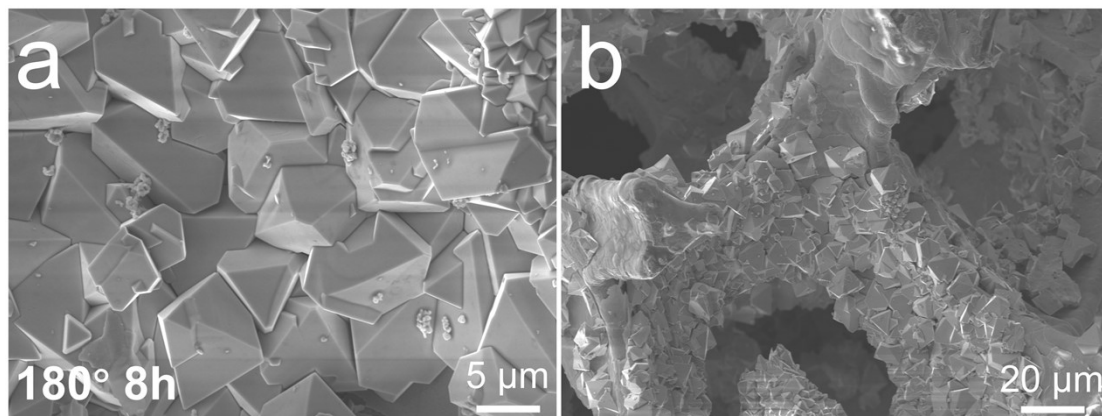

**Fig. S4.** 180 °C for 8 h SEM images of WO<sub>3</sub>/NF.

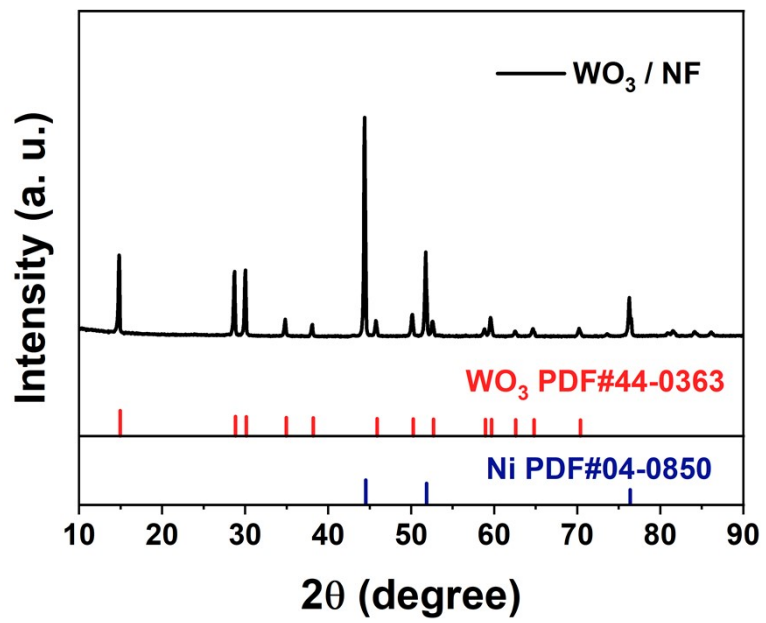

Fig. S5. 160 °C for 16 h XRD pattern of  $\text{WO}_3/\text{NF}$ .



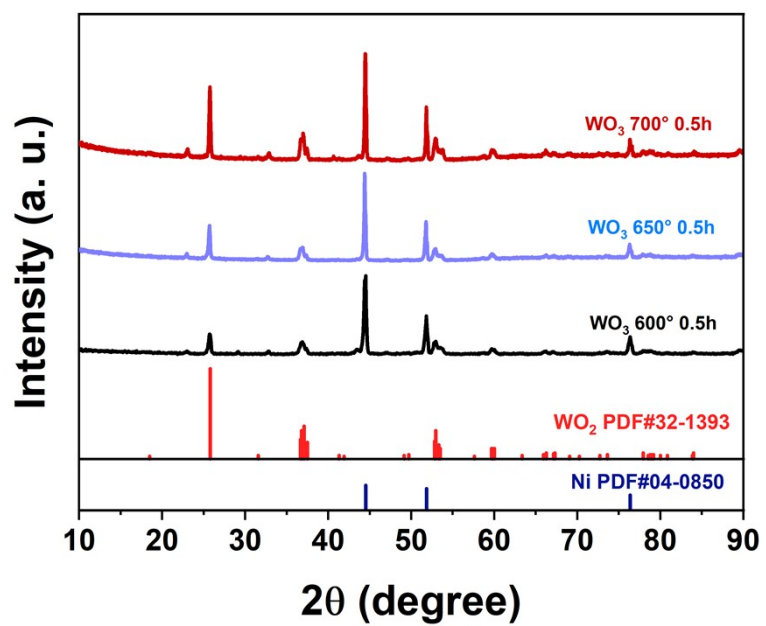

Fig. S6. XRD pattern of  $\text{WO}_2/\text{NF}$  at different calcination temperatures.

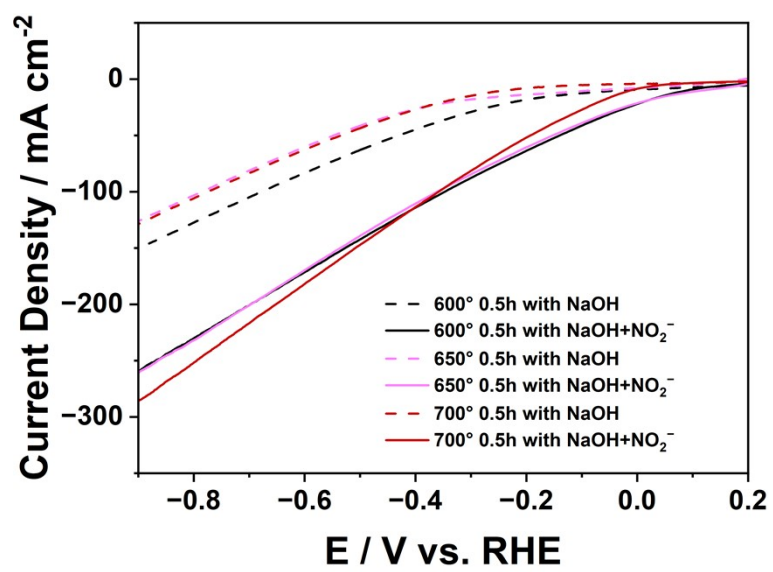

Fig. S7. LSV curves of WO<sub>2</sub>/NF at different temperatures.

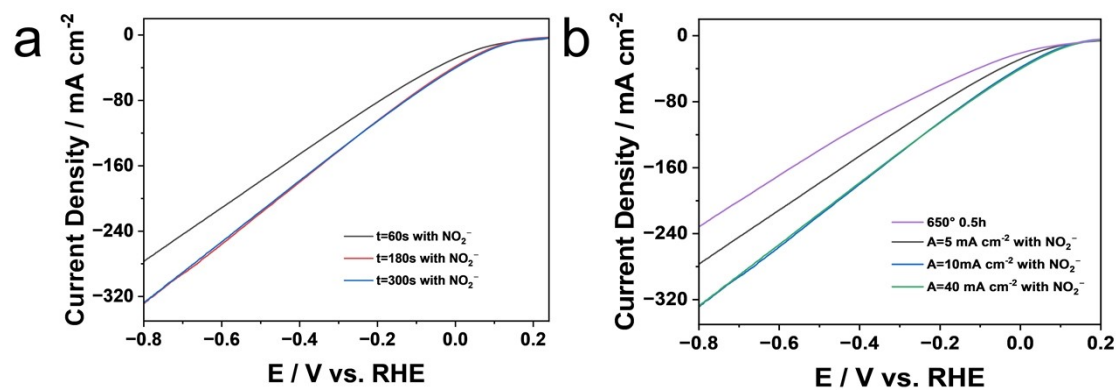

**Fig. S8.** (a) LSV curves of Ni@WO<sub>2</sub>/NF at different electrodeposition current densities. (b) Press the LSV curve of Ni@WO<sub>2</sub>/NF for different electrodeposition times.

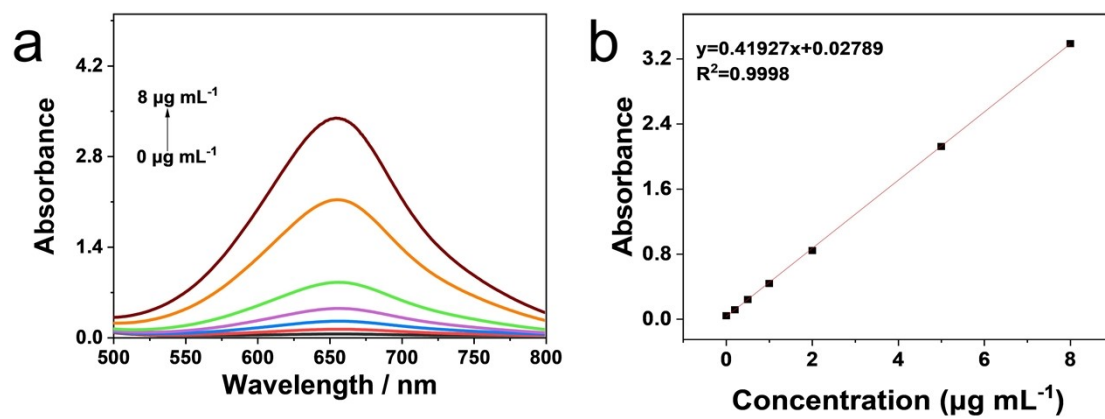

Fig. S9. (a) UV-Vis spectra and (b) corresponding calibration curves were used to calculate  $\text{NH}_4^+$ .

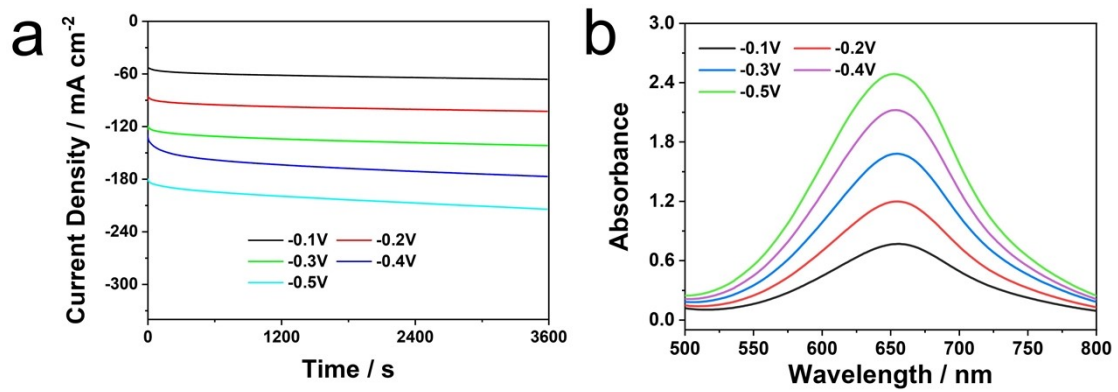

**Fig. S10.** (a) Chronoamperometry curves and (b) corresponding UV-Vis spectra of Ni@WO<sub>2</sub>/NF from -0.1 V to -0.5 V.

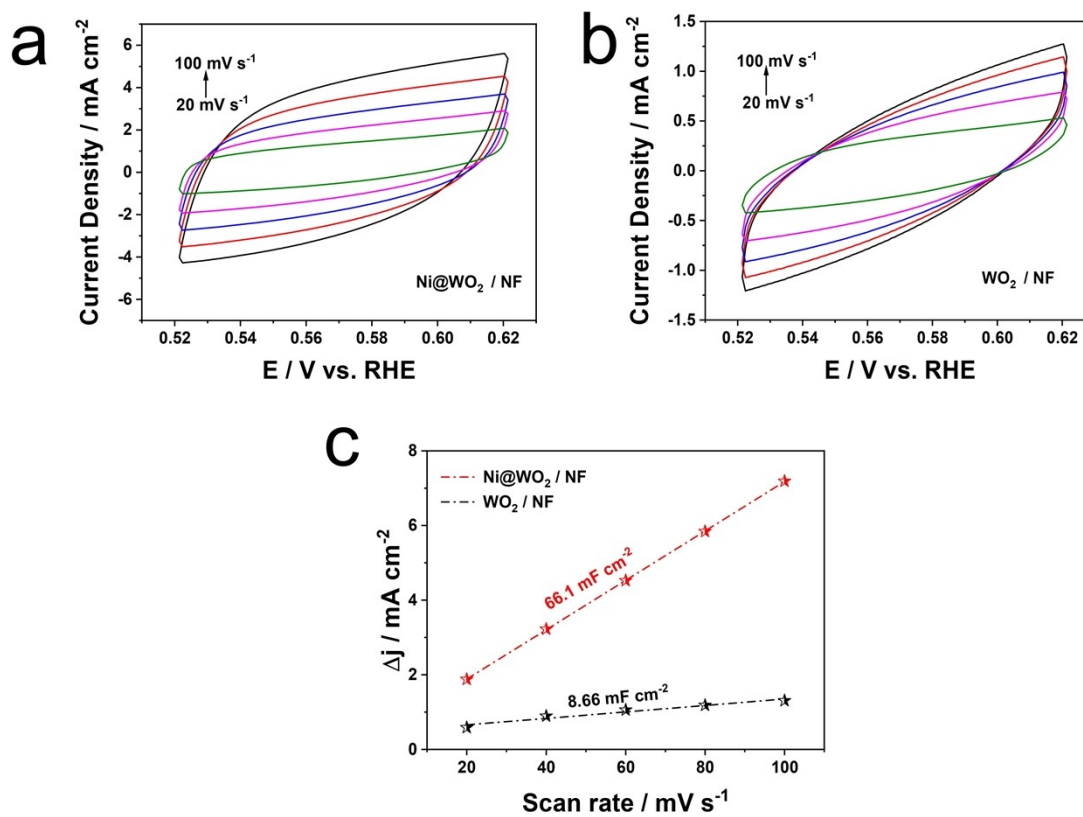

**Fig. S11.** CV curves of WO<sub>2</sub>/NF (a), Ni@WO<sub>2</sub>/NF (b) at different scan rates (20–100 mV s<sup>-1</sup>).

(c) The double-layer capacitance (C<sub>dl</sub>) for Ni@WO<sub>2</sub>/NF, and WO<sub>2</sub>/NF, respectively. C<sub>dl</sub> is proportional to the electrochemical surface area (ECSA).

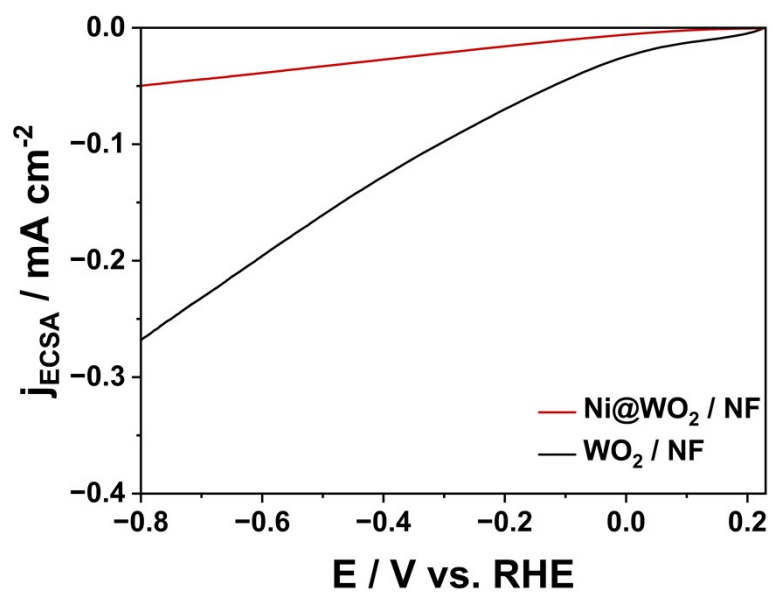

**Fig. S12.** ECSA-normalized current densities of Ni@WO<sub>2</sub>/NF and WO<sub>2</sub>/NF.

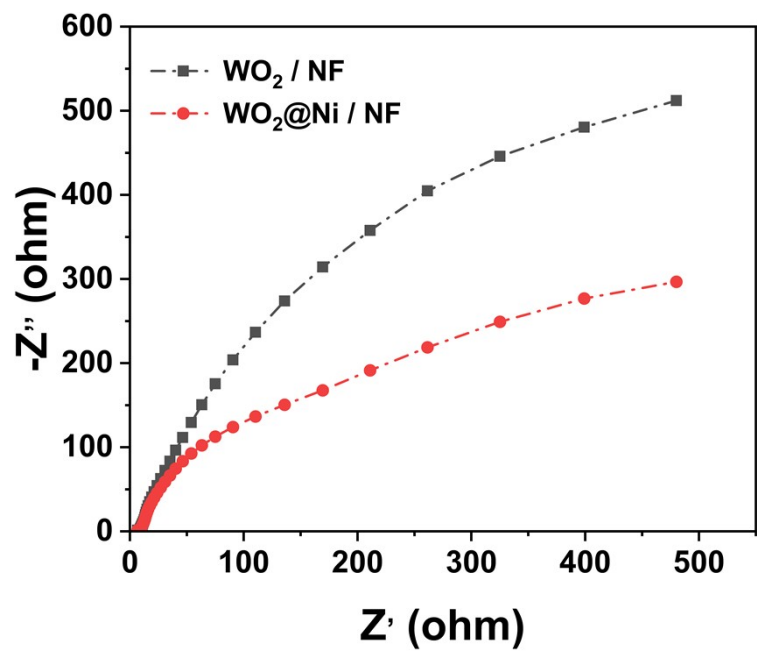

**Fig. S13.** Electrochemical impedance spectroscopy (EIS) for  $\text{Ni}@\text{WO}_2/\text{NF}$ , and  $\text{WO}_2/\text{NF}$ , respectively.



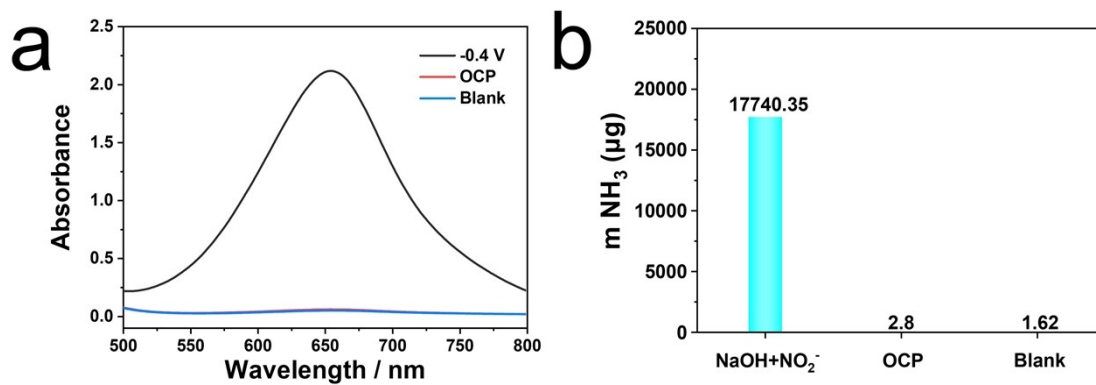

**Fig. S14.** (a) UV–Vis spectra and (b) amounts of electrogenerated  $\text{NH}_3$  under different operating conditions.

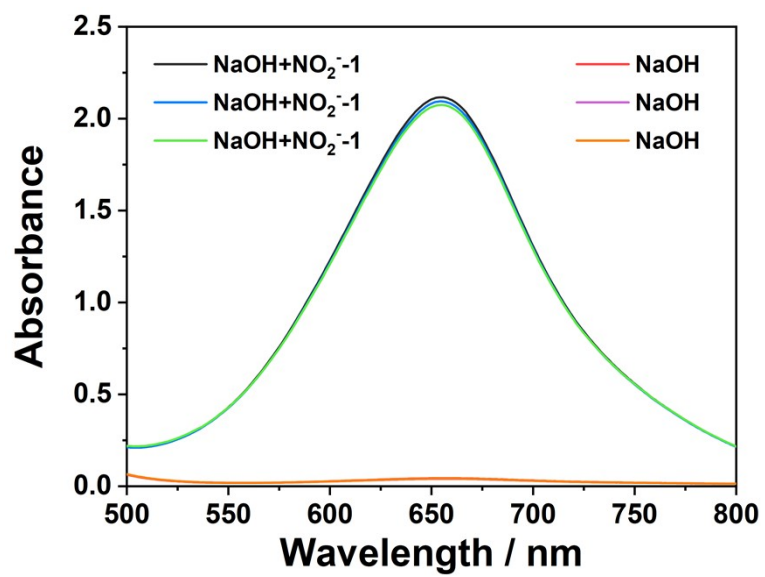

**Fig. S15.** UV-absorbable spectra of Ni@WO<sub>2</sub>/NF are tested alternately in a 0.1 M NaOH electrolyte with and without NaNO<sub>2</sub> and without NaNO<sub>2</sub>.

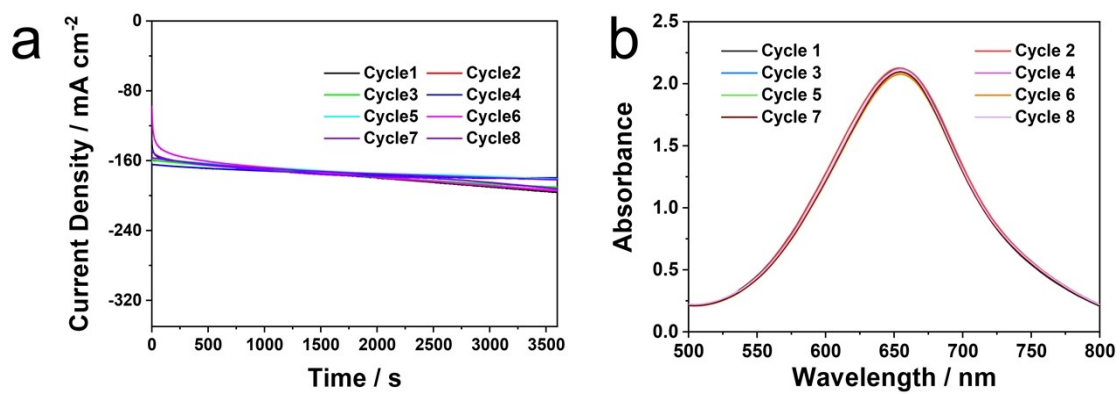

**Fig. S16.** (a) Chronoamperometry curves and (b) corresponding UV-Vis absorption spectra of Ni@WO<sub>2</sub>/NF for electrochemical catalytic production of NH<sub>3</sub> during cycling tests in 0.1 M NaOH with 0.1 M NO<sub>2</sub><sup>-</sup> at -0.4V.

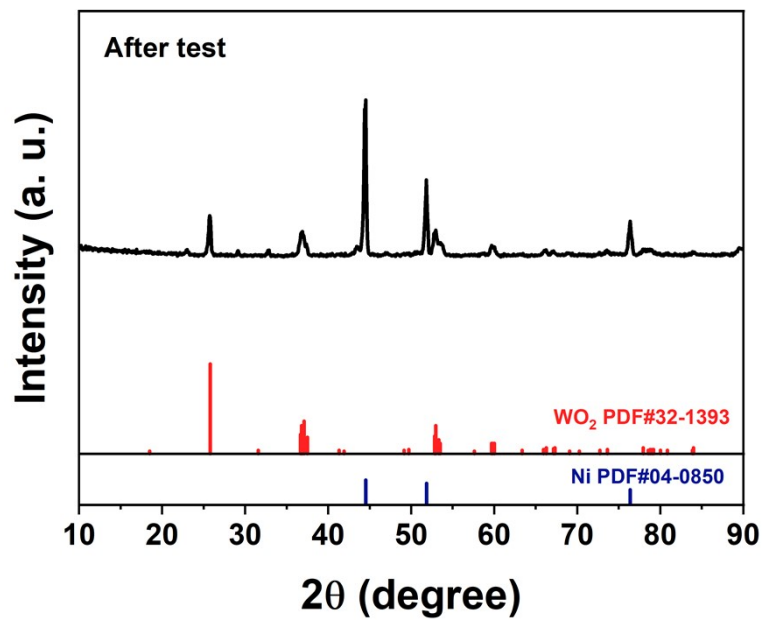

Fig. S17. XRD of Ni@WO<sub>2</sub>/NF after long electrolysis.

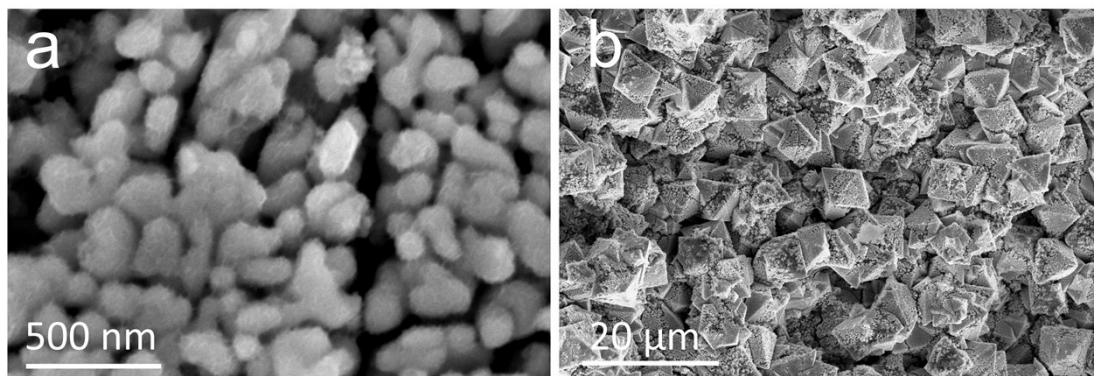

**Fig. S18.** SEM images of Ni@WO<sub>2</sub>/NF after long-term electrolysis.

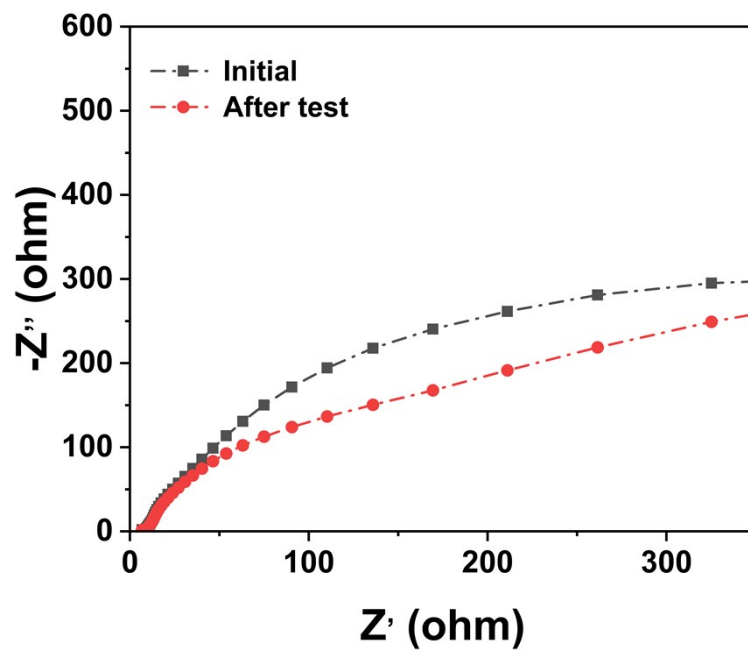

Fig. S19. EIS before and after stability test.

**Table S1.** Comparison of catalytic performance of Ni@WO<sub>2</sub>/NF with other reported NO<sub>2</sub>-RR electrocatalysts.

| Catalyst                           | Electrolyte                                                                      | FE (%)     | NH <sub>3</sub> yield rate                                                      | Refs.     |
|------------------------------------|----------------------------------------------------------------------------------|------------|---------------------------------------------------------------------------------|-----------|
| Ni@WO <sub>2</sub> /NF             | 0.1 M NaOH<br>(0.1 M NaNO <sub>2</sub> )                                         | 94.6       | 17959.3 μg h <sup>-1</sup> cm <sup>-2</sup><br>(1056.43 μmol cm <sup>-2</sup> ) | This work |
| Ag@NiO                             | 0.1 M NaOH<br>(0.1 M NaNO <sub>2</sub> )                                         | 97.7       | 5751 μg h <sup>-1</sup> cm <sup>-2</sup>                                        | 1         |
| C-NiWO <sub>4</sub>                | 0.1 M NaOH<br>(0.1 M NaNO <sub>2</sub> )                                         | 97.6       | 10974.36 μg h <sup>-1</sup> cm <sup>-2</sup>                                    | 2         |
| Ag@TiO <sub>2</sub>                | 0.1 M NaOH<br>(0.1 M NaNO <sub>2</sub> )                                         | 96.4       | 8743.1 μg h <sup>-1</sup> cm <sup>-2</sup>                                      | 3         |
| Ni@TiO <sub>2</sub>                | 0.1 M NaOH<br>(0.1 M NaNO <sub>2</sub> )                                         | 98.5       | 9667.9 μg h <sup>-1</sup> cm <sup>-2</sup>                                      | 4         |
| NiS <sub>2</sub> @TiO <sub>2</sub> | 0.1 M NaOH<br>(0.1 M NaNO <sub>2</sub> )                                         | 92.1       | 10062.3 μg h <sup>-1</sup> cm <sup>-2</sup>                                     | 5         |
| Ni-TiO <sub>2</sub>                | 0.1 M NaOH<br>(0.1 M NaNO <sub>2</sub> )                                         | 94.9       | 6464.6 μg h <sup>-1</sup> cm <sup>-2</sup>                                      | 6         |
| Cu/JDC                             | 0.1 M NaOH<br>(0.1 M NaNO <sub>2</sub> )                                         | 93.2       | 8899.5 μg h <sup>-1</sup> cm <sup>-2</sup>                                      | 7         |
| V-TiO <sub>2</sub>                 | 0.1 M NaOH<br>(0.1 M NaNO <sub>2</sub> )                                         | 93.2       | 7083.9 μg h <sup>-1</sup> cm <sup>-2</sup>                                      | 8         |
| A-TiO <sub>2x</sub>                | 0.1 M NaOH<br>(0.1 M NaNO <sub>2</sub> )                                         | 91.1       | 12230.1 μg h <sup>-1</sup> cm <sup>-2</sup>                                     | 9         |
| WO <sub>2</sub>                    | 0.1 M NaOH<br>(0.1 M NaNO <sub>2</sub> )                                         | 94.3       | 14964.25 μg h <sup>-1</sup> cm <sup>-2</sup>                                    | 10        |
| FEOOH NTA                          | 0.1 M NaOH<br>(0.1 M NaNO <sub>2</sub> )                                         | 94.7       | 11937 μg h <sup>-1</sup> cm <sup>-2</sup>                                       | 11        |
| Ni-NSA-V <sub>Ni</sub>             | 0.2 M Na <sub>2</sub> SO <sub>4</sub><br>(200 ppm NO <sub>2</sub> <sup>-</sup> ) | 88.9       | 235.98 μmol h <sup>-1</sup> cm <sup>-2</sup>                                    | 12        |
| Cobalt-tripeptide complex          | 1.0 M MOPS buffer<br>(1.0 M NaNO <sub>2</sub> )                                  | 90±3       | 3.01 × 10 <sup>-10</sup> mol s <sup>-1</sup> cm <sup>-2</sup>                   | 13        |
| Poly-NiTRP complex                 | NaNO <sub>2</sub><br>(0.1 M NaClO <sub>4</sub> )                                 | —          | 1.1 mM                                                                          | 14        |
| FeN <sub>5</sub> H <sub>2</sub>    | 1.0 M MOPS<br>(1.0 M NaNO <sub>2</sub> )                                         | > 90       | —                                                                               | 15        |
| Cu <sub>3</sub> P NA/CF            | 0.1 M PBS<br>(0.1 M NaNO <sub>2</sub> )                                          | 91.2 ± 2.5 | 1626.6 μg h <sup>-1</sup> cm <sup>-2</sup>                                      | 16        |

**Table S2.** Comparison of NH<sub>3</sub> yield and power density of our battery with recent Zn-N<sub>2</sub>, Zn-NO, Zn-NO<sub>2</sub><sup>-</sup>, or Zn-NO<sub>3</sub><sup>-</sup> battery systems.

| Catalyst                         | Battery Type                    | Power density (mW cm <sup>-2</sup> ) | Refs.     |
|----------------------------------|---------------------------------|--------------------------------------|-----------|
| Ni@WO <sub>2</sub> /NF           | Zn-NO <sub>2</sub> <sup>-</sup> | 9.05                                 | This work |
| Cu NDs                           | Zn-N <sub>2</sub>               | 0.0101                               | 17        |
| FeHTNs                           | Zn-N <sub>2</sub>               | 0.01642                              | 18        |
| VN@NSC                           | Zn-N <sub>2</sub>               | 0.01642                              | 19        |
| CoPi/HSNPC                       | Zn-N <sub>2</sub>               | 0.31                                 | 20        |
| NbS <sub>2</sub>                 | Zn-N <sub>2</sub>               | 0.31                                 | 21        |
| CoPi/NPCS                        | Zn-N <sub>2</sub>               | 0.49                                 | 22        |
| Ti <sub>2</sub> O <sub>3</sub>   | Zn-N <sub>2</sub>               | 1.02                                 | 23        |
| FePS <sub>3</sub>                | Zn-N <sub>2</sub>               | 2.6                                  | 24        |
| CoP                              | Zn-NO                           | 0.496                                | 25        |
| NiO                              | Zn-NO                           | 0.88                                 | 26        |
| MoS <sub>2</sub>                 | Zn-NO                           | 1.04                                 | 27        |
| Fe <sub>2</sub> O <sub>3</sub>   | Zn-NO                           | 1.18                                 | 28        |
| Ni <sub>2</sub> P                | Zn-NO                           | 1.53                                 | 29        |
| TiO <sub>2</sub> @Ti             | Zn-NO                           | 1.7                                  | 30        |
| MoC                              | Zn-NO                           | 1.8                                  | 31        |
| VN                               | Zn-NO                           | 2.0                                  | 32        |
| CoS                              | Zn-NO                           | 2.06                                 | 33        |
| BiNDs                            | Zn-NO                           | 2.33                                 | 34        |
| Bi@C                             | Zn-NO                           | 2.35                                 | 35        |
| ITO@TiO <sub>2</sub> TP          | Zn-NO <sub>2</sub> <sup>-</sup> | 1.22                                 | 36        |
| A-TiO <sub>2-x</sub>             | Zn-NO <sub>2</sub> <sup>-</sup> | 2.38                                 | 37        |
| TiO <sub>2</sub>                 | Zn-NO <sub>3</sub> <sup>-</sup> | 0.87                                 | 38        |
| Fe/Ni <sub>2</sub> P             | Zn-NO <sub>3</sub> <sup>-</sup> | 3.25                                 | 39        |
| Co <sub>2</sub> AlO <sub>4</sub> | Zn-NO <sub>3</sub> <sup>-</sup> | 3.43                                 | 40        |
| CeO <sub>2</sub>                 | Zn-NO <sub>3</sub> <sup>-</sup> | 3.44                                 | 41        |
| NiCo <sub>2</sub> O <sub>4</sub> | Zn-NO <sub>3</sub> <sup>-</sup> | 3.94                                 | 42        |



## References

- 1 Q. Liu, G. Wen, D. Zhao, L. Xie, S. Sun, L. Zhang, Y. Luo, A. Ali Alshehri, M.S. Hamdy, Q. Kong, X. Sun, Nitrite reduction over Ag nanoarray electrocatalyst for ammonia synthesis, *Journal of Colloid and Interface Science* **623** (2022) 513-519.
- 2 H. Qiu, Q. Chen, J. Zhang, X. An, Q. Liu, L. Xie, W. Yao, X. Sun, Q. Kong, NiWO<sub>4</sub> nanoparticles with oxygen vacancies: high-efficiency electrosynthesis of ammonia with selective reduction of nitrite, *Inorganic Chemistry Frontiers* **10** (2023) 3909-3915.
- 3 X. Fan, X. He, X. Ji, L. Zhang, J. Li, L. Hu, X. Li, S. Sun, D. Zheng, Y. Luo, Y. Wang, L. Xie, Q. Liu, B. Ying, X. Sun, High-efficiency electrosynthesis of ammonia with selective reduction of nitrite over an Ag nanoparticle-decorated TiO<sub>2</sub> nanoribbon array, *Inorganic Chemistry Frontiers* **10** (2023) 1431-1435.
- 4 X. Ji, C. Ma, F. Zhang, X. He, X. Fan, J. Li, Z. Li, L. Ouyang, L. Zhang, T. Li, D. Zhao, Y. Wang, J. Zhang, Z. Cai, S. Sun, A.A. Alshehri, Q. Lu, X. Sun, Ni@TiO<sub>2</sub> Nanoarray with the Schottky Junction for the Highly Selective Electrochemical Reduction of Nitrite to Ammonia, *ACS Sustainable Chemistry & Engineering* **11** (2023) 2686-2691.
- 5 X. He, L. Hu, L. Xie, Z. Li, J. Chen, X. Li, J. Li, L. Zhang, X. Fang, D. Zheng, S. Sun, J. Zhang, A. Ali Alshehri, Y. Luo, Q. Liu, Y. Wang, X. Sun, Ambient ammonia synthesis via nitrite electro reduction over NiS<sub>2</sub> nanoparticles-

- decorated TiO<sub>2</sub> nanoribbon array, *Journal of Colloid and Interface Science* **634** (2023) 86-92.
- 6 Z. Cai, C. Ma, D. Zhao, X. Fan, R. Li, L. Zhang, J. Li, X. He, Y. Luo, D. Zheng, Y. Wang, B. Ying, S. Sun, J. Xu, Q. Lu, X. Sun, Ni doping enabled improvement in electrocatalytic nitrite-to-ammonia conversion over TiO<sub>2</sub> nanoribbon, *Materials Today Energy* **31** (2023).
- 7 L. Ouyang, L. Yue, Q. Liu, Q. Liu, Z. Li, S. Sun, Y. Luo, A. Ali Alshehri, M.S. Hamdy, Q. Kong, X. Sun, Cu nanoparticles decorated juncus-derived carbon for efficient electrocatalytic nitrite-to-ammonia conversion, *Journal of Colloid and Interface Science* **624** (2022) 394-399.
- 8 H. Wang, F. Zhang, M. Jin, D. Zhao, X. Fan, Z. Li, Y. Luo, D. Zheng, T. Li, Y. Wang, B. Ying, S. Sun, Q. Liu, X. Liu, X. Sun, V-doped TiO<sub>2</sub> nanobelt array for high-efficiency electrocatalytic nitrite reduction to ammonia, *Materials Today Physics* **30** (2023).
- 9 Z. Ren, Q. Chen, X. An, Q. Liu, L. Xie, J. Zhang, W. Yao, M.S. Hamdy, Q. Kong, X. Sun, High-Efficiency Ammonia Electrosynthesis on Anatase TiO<sub>2-x</sub> Nanobelt Arrays with Oxygen Vacancies by Selective Reduction of Nitrite, *Inorganic Chemistry* **61** (2022) 12895-12902.
- 10 H. Qiu, Q. Chen, X. An, Q. Liu, L. Xie, J. Zhang, W. Yao, Y. Luo, S. Sun, Q. Kong, J. Chen, X. Sun, WO<sub>2</sub> nanoparticles with oxygen vacancies: a high-efficiency electrocatalyst for the conversion of nitrite to ammonia, *Journal of Materials Chemistry A* **10** (2022) 24969-24974.

- 11 Q. Liu, Q. Liu, L. Xie, L. Yue, T. Li, Y. Luo, N. Li, B. Tang, L. Yu, X. Sun, A 3D FeOOH nanotube array: an efficient catalyst for ammonia electrosynthesis by nitrite reduction, *Chemical Communications* **58** (2022) 5160-5163.
- 12 C. Wang, W. Zhou, Z. Sun, Y. Wang, B. Zhang and Y. Yu, *J. Mater. Chem. A*, 2021, **9**, 239-243.
- 13 Y. Guo, J. R. Stroka, B. Kandemir, C. E. Dickerson and K. L. Bren, *J. Am. Chem. Soc.*, 2018, **140**, 16888-16892.
- 14 P. Dreyse, M. Isaacs, K. Calfumán, C. Cáceres, A. Aliaga, M. J. Aguirre and D. Villagra, *Electrochim. Acta*, 2011, **56**, 5230-5237.
- 15 J. R. Stroka, B. Kandemir, E. M. Matson and K. L. Bren, *ACS Catal.*, 2020, **10**, 13968-13972.
- 16 J. Liang, B. Deng, Q. Liu, G. Wen, Q. Liu, T. Li, Y. Luo, A. A. Alshehri, K. A. Alzahrani and D. Ma, *Green Chem.*, 2021, **23**, 5487-5493.
- 17 C. Du, Y. Gao, J. Wang and W. Chem. Commun., 2019, **55**, 12801-12804.
- 18 X.-W. Lv, X.-L. Liu, L.-J. Gao, Y.-P. Liu and Z.-Y. Yuan, *J. Mater. Chem. A*, 2021, **9**, 4026-4035.
- 19 X.-W. Lv, Y. Liu, Y.-S. Wang, X.-L. Liu and Z.-Y. Yuan, *Appl. Catal. B*, 2021, **280**, 119434.
- 20 J.-T. Ren, L. Chen, Y. Liu and Z.-Y. Yuan, *J. Mater. Chem. A*, 2021, **9**, 11370-11380.
- 21 H. Wang, J. Si, T. Zhang, Y. Li, B. Yang, Z. Li, J. Chen, Z. Wen, C. Yuan, L. Lei and Y. Hou, *Appl. Catal. B*, 2020, **270**, 118892.

- 22 J. T. Ren, L. Chen, H. Y. Wang and Z. Y. Yuan, *ACS Appl. Mater. Interfaces*, 2021, **13**, 12106-12117.
- 23 H.-j. Chen, Z.-q. Xu, S. Sun, Y. Luo, Q. Liu, M. S. Hamdy, Z.-s. Feng, X. Sun and Y. Wang, *Inorg. Chem. Front.*, 2022, **9**, 4608-4613.
- 24 H. Wang, Z. Li, Y. Li, B. Yang, J. Chen, L. Lei, S. Wang and Y. Hou, *Nano Energy*, 2021, **81**.
- 25 J. Liang, W.-F. Hu, B. Song, T. Mou, L. Zhang, Y. Luo, Q. Liu, A. A. Alshehri, M. S. Hamdy, L.-M. Yang and X. Sun, *Inorg. Chem. Front.*, 2022, **9**, 1366-1372.
- 26 P. Liu, J. Liang, J. Wang, L. Zhang, J. Li, L. Yue, Y. Ren, T. Li, Y. Luo, N. Li, B. Tang, Q. Liu, A. M. Asiri, Q. Kong and X. Sun, *Chem. Commun.*, 2021, **57**, 13562-13565.
- 27 L. Zhang, J. Liang, Y. Wang, T. Mou, Y. Lin, L. Yue, T. Li, Q. Liu, Y. Luo, N. Li, B. Tang, Y. Liu, S. Gao, A. A. Alshehri, X. Guo, D. Ma and X. Sun, *Angew. Chem. Int. Ed*, 2021, **60**, 25263-25268.
- 28 J. Liang, H. Chen, T. Mou, L. Zhang, Y. Lin, L. Yue, Y. Luo, Q. Liu, N. Li, A. A. Alshehri, I. Shakir, P. O. Agboola, Y. Wang, B. Tang, D. Ma and X. Sun, *J. Mater. Chem. A*, 2022, **10**, 6454-6462.
- 29 T. Mou, J. Liang, Z. Ma, L. Zhang, Y. Lin, T. Li, Q. Liu, Y. Luo, Y. Liu, S. Gao, H. Zhao, A. M. Asiri, D. Ma and X. Sun, *J. Mater. Chem. A*, 2021, **9**, 24268-24275.
- 30 J. Liang, P. Liu, Q. Li, T. Li, L. Yue, Y. Luo, Q. Liu, N. Li, B. Tang, A. A.

- Alshehri, I. Shakir, P. O. Agboola, C. Sun and X. Sun, *Angew. Chem. Int. Ed.*, 2022, **61**, e202202087.
- 31 G. Meng, M. Jin, T. Wei, Q. Liu, S. Zhang, X. Peng, J. Luo and X. Liu, *Nano Res.*, 2022, DOI: 10.1007/s12274-022-4747-y.
- 32 D. Qi, F. Lv, T. Wei, M. Jin, G. Meng, S. Zhang, Q. Liu, W. Liu, D. Ma, M. S. Hamdy, J. Luo and X. Liu, *Nano Res. Energy*, 2022, **1**, e9120022.
- 33 L. Zhang, Q. Zhou, J. Liang, L. Yue, T. Li, Y. Luo, Q. Liu, N. Li, B. Tang, F. Gong, X. Guo and X. Sun, *Inorg. Chem.*, 2022, **61**, 8096-8102.
- 34 Y. Lin, J. Liang, H. Li, L. Zhang, T. Mou, T. Li, L. Yue, Y. Ji, Q. Liu, Y. Luo, N. Li, B. Tang, Q. Wu, M. S. Hamdy, D. Ma and X. Sun, *Mater. Today Phys.*, 2022, **22**.
- 35 Q. Liu, Y. Lin, L. Yue, J. Liang, L. Zhang, T. Li, Y. Luo, M. Liu, J. You, A. A. Alshehri, Q. Kong and X. Sun, *Nano Res.*, 2022, **15**, 5032-5037.
- 36 S. Li, J. Liang, P. Wei, Q. Liu, L. Xie, Y. Luo and X. Sun, *eScience*, 2022, **2**, 382-388.
- 37 Z. Ren, Q. Chen, X. An, Q. Liu, L. Xie, J. Zhang, W. Yao, M. S. Hamdy, Q. Kong and X. Sun, *Inorg. Chem.*, 2022, **61**, 12895-12902.
- 38 Y. Guo, R. Zhang, S. Zhang, Y. Zhao, Q. Yang, Z. Huang, B. Dong and C. Zhi, *Energy Environ. Sci.*, 2021, **14**, 3938-3944.
- 39 R. Zhang, Y. Guo, S. Zhang, D. Chen, Y. Zhao, Z. Huang, L. Ma, P. Li, Q. Yang, G. Liang and C. Zhi, *Adv. Energy Mater.*, 2022, **12**.
- 40 Z. Deng, J. Liang, Q. Liu, C. Ma, L. Xie, L. Yue, Y. Ren, T. Li, Y. Luo, N. Li,

- B. Tang, A. Ali Alshehri, I. Shakir, P. O. Agboola, S. Yan, B. Zheng, J. Du, Q. Kong and X. Sun, *Chem. Eng. J.*, 2022, **435**.
- 41 Z. Li, Z. Deng, L. Ouyang, X. Fan, L. Zhang, S. Sun, Q. Liu, A. A. Alshehri, Y. Luo, Q. Kong and X. Sun, *Nano Res.*, 2022, DOI: 10.1007/s12274-022-4863-8.
- 42 Q. Liu, L. Xie, J. Liang, Y. Ren, Y. Wang, L. Zhang, L. Yue, T. Li, Y. Luo, N. Li, B. Tang, Y. Liu, S. Gao, A. A. Alshehri, I. Shakir, P. O. Agboola, Q. Kong, Q. Wang, D. Ma and X. Sun, *Small*, 2022, **18**, 2106961.
